# Supplementary material for: Efficient 2,3-Butanediol Production from Cassava Powder by a Crop-Biomass-Utilizer, Enterobacter cloacae subsp. dissolvens SDM
Source: PubMed Central journal article supplement (PMC3390385; doi:10.1371/journal.pone.0040442), 2012-07-05
Supplement: pone.0040442.s001.pdf [file pone.0040442.s001.pdf]

1

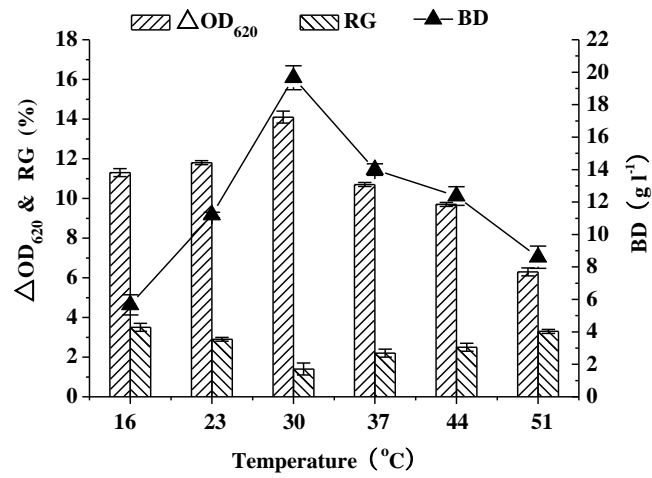

2

3 **Figure S1. Effects of temperature on cell growth and BD production.**  $\Delta OD_{620}$ : the  
4 cell growth, which was determined by the difference value between the measured  
5 optical density in the fermentation process and the initial value at the beginning of the  
6 fermentation. RG: residual glucose. BD: 2,3-butanediol concentration. Data are the  
7 means  $\pm$  SDs from three parallel experiments. Fermentations were carried out in  
8 500-ml flasks with 100 ml of medium.
