# Supplementary material for: Efficient 2,3-Butanediol Production from Cassava Powder by a Crop-Biomass-Utilizer, Enterobacter cloacae subsp. dissolvens SDM
Source: PubMed Central journal article supplement (PMC3390385; doi:10.1371/journal.pone.0040442), 2012-07-05
Supplement: pone.0040442.s002.pdf [file pone.0040442.s002.pdf]

1

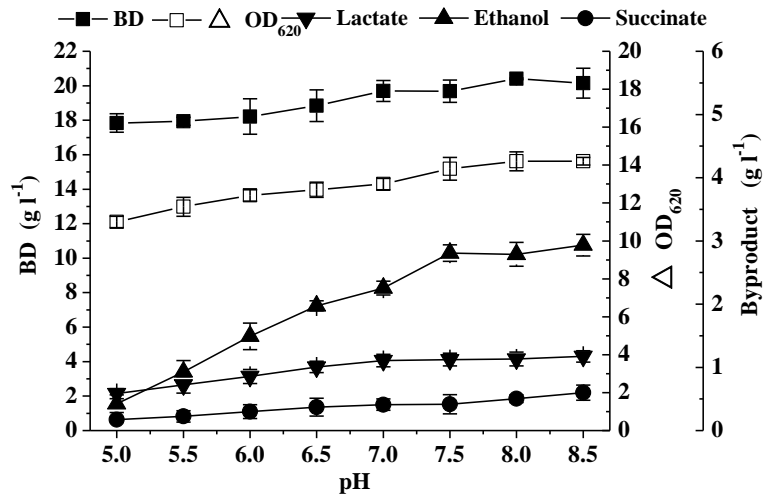

2

3 **Figure S2. Effects of the initial pH of the medium on cell growth and BD**

4 **production.** Data are the means  $\pm$  SDs from three parallel experiments. The medium

5 consisted of cassava powder hydrolysate (glucose concentration in the medium is 50 g

6 l<sup>-1</sup>), peptone 5 g l<sup>-1</sup>, yeast extract 5 g l<sup>-1</sup>, sodium acetate 4 g l<sup>-1</sup>, KCl 0.5 g l<sup>-1</sup>,

7 MgSO<sub>4</sub>·7H<sub>2</sub>O 0.15 g l<sup>-1</sup>, FeSO<sub>4</sub>·7H<sub>2</sub>O 0.05 g l<sup>-1</sup>, MnSO<sub>4</sub>·7H<sub>2</sub>O 0.03 g l<sup>-1</sup>.

8 Fermentations were carried out in 500-ml flasks with 100 ml of medium at 30°C.
